# Supplementary material for: Streptomyces sp. AC04842: Genomic Insights and Functional Expression of Its Latex Clearing Protein Genes (lcp1 and lcp2) When Cultivated With Natural and Vulcanized Rubber as the Sole Carbon Source
Source: PubMed Central journal article supplement (PMC9108482; doi:10.3389/fmicb.2022.854427), 2022-05-02

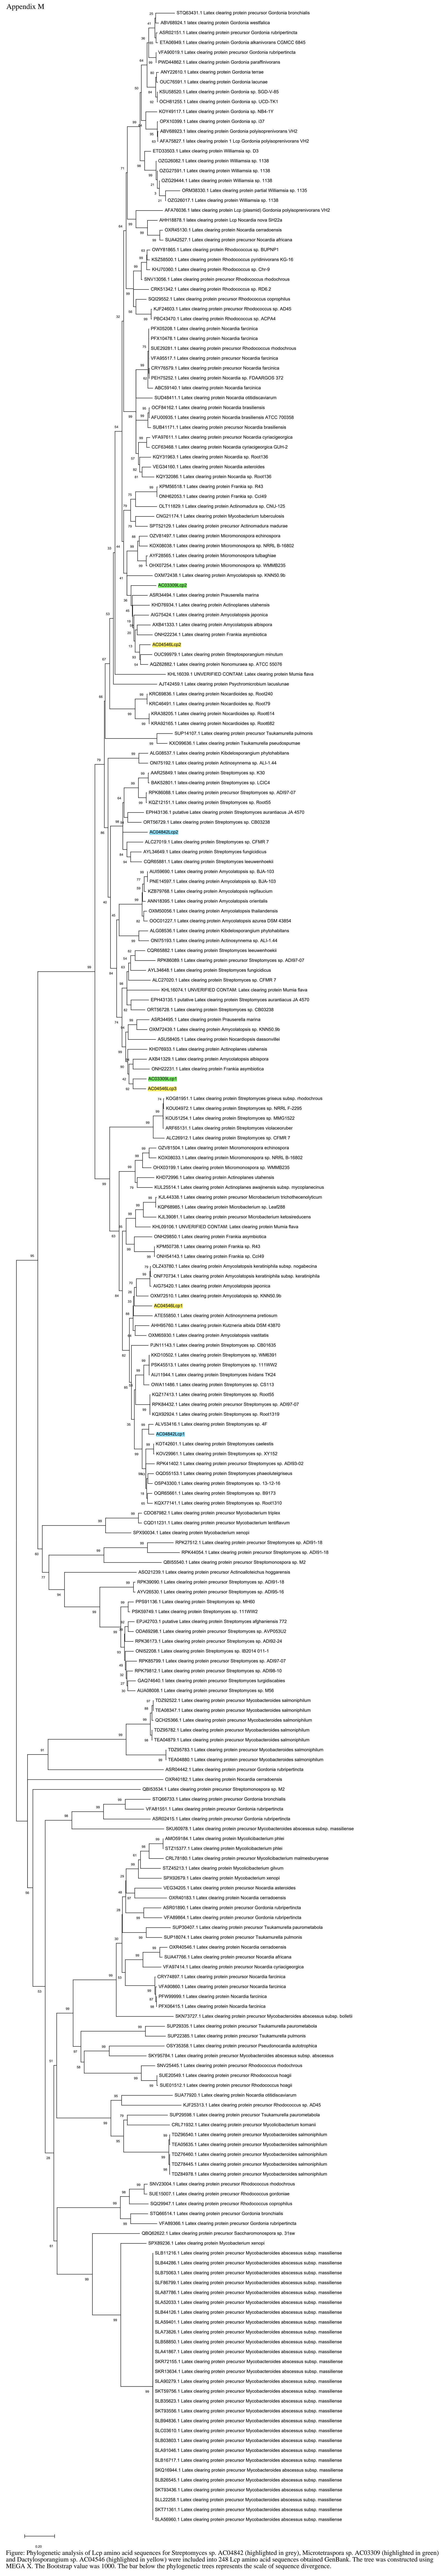

Supplement: Table_1.pdf [file Table_1.pdf]
